# Supplementary material for: Bifidobacterial Transfer from Mother to Child as Examined by an Animal Model
Source: PubMed Central journal article supplement (PMC6780879; doi:10.3390/microorganisms7090293), 2019-08-27
Supplement: microorganisms-07-00293-s001.pdf [file microorganisms-07-00293-s001.pdf]

Supplementary

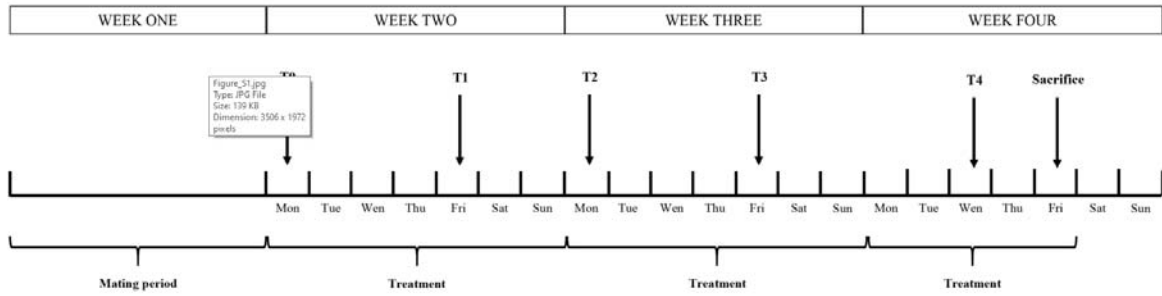

Figure S1

**Figure 1.** Timeline and general features of experimental procedure. This figure shows the schedule of the experimental procedures.

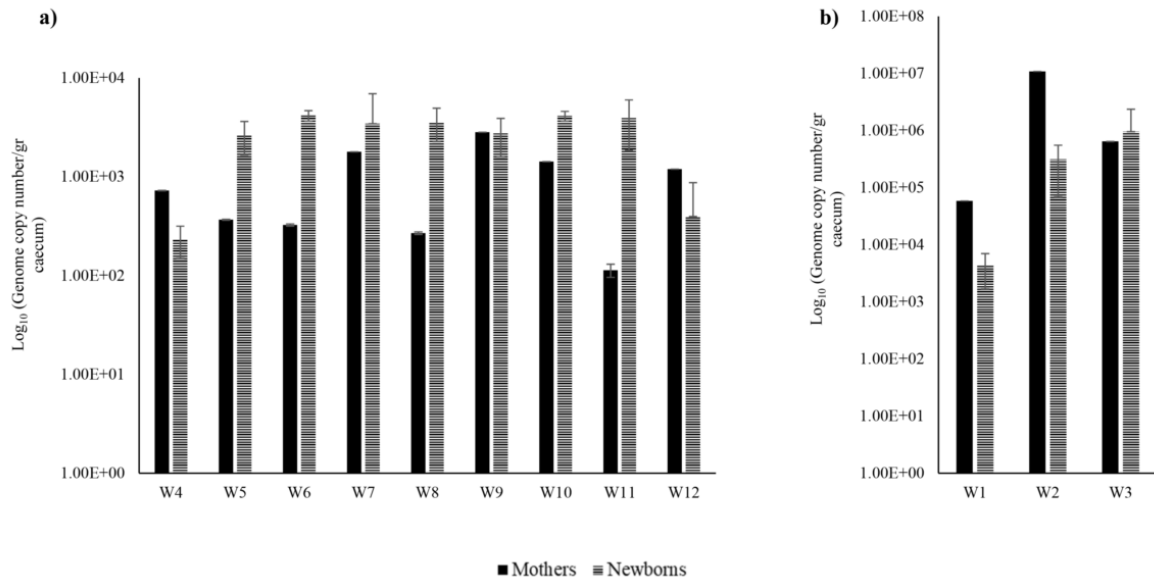

**Figure 2.** Schematic comparison of *B. bifidum* PRL2010 cell load in mothers caecum respect to newborns for each group. Panel a) display the PRL2010 load of mothers PG vs. newborn PG. Panel b) shows the PRL2010 load of mothers MCG vs. newborn MCG.
